# Supplementary material
Source: Research Square preprint supplement (doi:10.21203/rs.3.rs-9064673/v1)
Supplement: Supplementary file 1 [file f1897e928d463ce08cc54249.docx]

**Additional file 1. Supplementary information**

**Supplementary Methods: Rationale for sample size**

We summarized sample sizes from prior head‑down tilt (HDT) and head‑down tilt bed rest (HDTBR) studies that assessed venous hemodynamics using MRI or ultrasound (Table S1). Many venous‑focused HDT or HDTBR studies enrolled relatively small cohorts because of logistical constraints, limited scanner availability, and the burden of repeated physiological and imaging measurements. Our protocol included eight repeated MRI sessions per participant spanning baseline, HDT exposure, and recovery. To contextualize the study size for this high‑cost, intensive imaging protocol, we recruited 40 healthy adult males and analyzed 38 participants after excluding two datasets for insufficient image quality. This study size is comparatively large for an imaging‑based venous HDT or HDTBR experiment with dense longitudinal sampling.

Table S1. Sample sizes of prior HDT or HDTBR studies assessing venous hemodynamics

| **Study** | **Protocol** | **Venous outcomes (examples)** | **Modality** | **Sample size (analyzed)** |
| --- | --- | --- | --- | --- |
| Marshall‑Goebel et al., 2016 (J Appl Physiol) | Acute HDT (−6°, −12°, −18°), 4.5 h; baseline supine 0° | IJV flow and CSA (plus arteries) | Phase‑contrast MRI | n=9 |
| Marshall‑Goebel et al., 2018 (Aerosp Med Hum Perform) | Tilt‑table 0–30°; then ~26 h of 12° HDTBR ± 0.5% CO₂ | Right IJV CSA and volume | Ultrasound | n=6 |
| Zahid et al., 2021 (Fluids Barriers CNS) | Acute 15° HDT; pre vs during HDT | Major cerebral veins (with arterial and CSF flow) | PC‑MRI | n=15 |
| Boschert et al., 2023 (npj Microgravity) | 21 h bed rest, −12° HDT vs 0° supine; baseline, 1 h, 21 h | Jugular venous flow (internal system) and related flows | Cine PC‑MRI | n=11 |
| Ogoh et al., 2020 (Exp Physiol) | Long‑term −6° HDTBR, 60 days; baseline, day 30, day 57 | IJV and vertebral vein flow | Ultrasound | n=10 |
| Whittle & Diaz‑Artiles, 2023 (J Appl Physiol) | Graded head‑up to head‑down tilt in 15° steps | IJV area and venous pressure | Ultrasound | n=12 |
| Watkins et al., 2017 (J Appl Physiol) | 15° HDT with or without *LBNP*; short‑duration postures | IJV CSA (and noninvasive ICP surrogate) | Ultrasound | n=15 |
| Patterson et al., 2022 (Physiol Rep) | Three HDT levels; four LBNP levels | Jugular venous CSA and optical attenuation | CHI + ultrasound | n=20 (10 men, 10 women) |
| Laurie et al., 2025 (J Appl Physiol) | Strict −6° HDTBR, 30 days; repeated assessments (days 3/17/30) | IJV CSA as a marker of headward fluid shift | Ultrasound | Total n=47 (group sizes 12, 12, 11, 12) |
| Nimpal et al., 2025 (J Cereb Blood Flow Metab) | ~2 h −10° HDT; four MRI sessions | Cranial venous outflow | Multimodal MRI | n=21 |
| Current study | −6° HDT, 7-days + 5‑day recovery; 8 MRI time points | Intracranial dural venous sinus | 4D flow MRI | n=38 (40 recruited) |

Note: HDT = head‑down tilt; HDTBR = head‑down tilt bed rest; IJV = internal jugular vein; CSA = cross‑sectional area; PC‑MRI = phase‑contrast MRI; LBNP = lower‑body negative pressure; CHI = non-contact coded hemodynamic imaging.

**Supplementary Analysis: Intraclass correlation coefficient (ICC)**

Inter-observer reliability was assessed using the intraclass correlation coefficient (ICC). Specifically, we applied a two-way random-effects model with absolute agreement to estimate single-measure reliability ((ICC (2,1)), reflecting the consistency between two independent observers when a single observer's measurement (Observer1) was used for subsequent analyses. ICC values are reported with 95% confidence intervals derived from an F-distribution approach (Table S2).

Table S2. Inter-observer reliability for superior sagittal sinus (SSS) measurements (n=30)

| **Measurement** | **ICC (2,1)** | **95% CI** | **F (dfl, df2)** |
| --- | --- | --- | --- |
| SSS CSAmean | 0.908 | (0.819, 0.955) | 29.488 (29, 29) |
| SSS Qmean | 0.929 | (0.856, 0.965) | 30.327 (29, 29) |

Note: SSS = superior sagittal sinus; ICC = intraclass correlation coefficient; CSAmean = mean cross-sectional area; Qmean = mean blood flow rate. F statistics with numerator and denominator degrees of freedom are provided for the ICC estimates.
